# Supplementary material
Source: PubMed Central journal article supplement (PMC6981067)
Supplement: NIHMS1544382-supplement-1.pdf [file NIHMS1544382-supplement-1.pdf]

**Supplemental Table 1. Changes in cytokine and chemokine levels in lung granuloma homogenates and Mtb-infected LNs from anti-IL-10 animals compared to controls.**

| Cytokine   | Lung Granuloma        |                             | Mtb-Infected LNs |                |
|------------|-----------------------|-----------------------------|------------------|----------------|
|            | 4 Weeks               | 8 Weeks                     | 4 Weeks          | 8 Weeks        |
| G-CSF      | Increase <sup>1</sup> | Below LLOQ <sup>3</sup>     | No Difference    | No Difference  |
| GM-CSF     | Below LLOQ            | Not Determined <sup>4</sup> | Below LLOQ       | Below LLOQ     |
| IFN-alpha  | Below LLOQ            | Below LLOQ                  | Below LLOQ       | No Difference  |
| IFN-beta   | Below LLOQ            | Decrease <sup>2</sup>       | Not Determined   | Not Determined |
| IL-1beta   | No Difference         | Decrease                    | Increase         | No Difference  |
| IL-1RA     | No Difference         | Decrease                    | No Difference    | No Difference  |
| IL-6       | No Difference         | Decrease                    | No Difference    | No Difference  |
| IL-7       | Below LLOQ            | Decrease                    | Below LLOQ       | Below LLOQ     |
| IL-8       | No Difference         | Not Determined              | No Difference    | No Difference  |
| IL-12p70   | Increase              | Below LLOQ                  | No Difference    | Below LLOQ     |
| IL-15      | Below LLOQ            | Below LLOQ                  | No Difference    | Below LLOQ     |
| IL-18      | Decrease              | No Difference               | No Difference    | No Difference  |
| IL-23      | Increase              | No Difference               | Below LLOQ       | Below LLOQ     |
| IFN-gamma  | Below LLOQ            | Below LLOQ                  | Increase         | No Difference  |
| IL-2       | Increase              | Below LLOQ                  | Increase         | Below LLOQ     |
| IL-4       | Below LLOQ            | Below LLOQ                  | Below LLOQ       | No Difference  |
| IL-5       | Below LLOQ            | Below LLOQ                  | Below LLOQ       | Below LLOQ     |
| IL-10      | Below LLOQ            | Below LLOQ                  | Below LLOQ       | Below LLOQ     |
| TNF        | No Difference         | Below LLOQ                  | Increase         | No Difference  |
| IL-13      | Increase              | Below LLOQ                  | Increase         | Below LLOQ     |
| IL-17      | Below LLOQ            | Below LLOQ                  | No Difference    | Below LLOQ     |
| BLC/CXCL13 | Below LLOQ            | Not Determined              | Increase         | No Difference  |
| Eotaxin    | Below LLOQ            | Not Determined              | Below LLOQ       | Below LLOQ     |
| IP-10      | Below LLOQ            | Not Determined              | Below LLOQ       | Below LLOQ     |
| I-TAC      | Not Determined        | Not Determined              | Increase         | No Difference  |
| MCP-1      | Above LLOQ            | Not Determined              | No Difference    | No Difference  |
| MIG        | No Difference         | Not Determined              | No Difference    | No Difference  |
| MIP-1alpha | Decrease              | Not Determined              | No Difference    | No Difference  |
| MIP-1beta  | No Difference         | Not Determined              | No Difference    | No Difference  |
| SDF-1alpha | Decrease              | Not Determined              | Increase         | No Difference  |
| sCD40L     | Below LLOQ            | No Difference               | Below LLOQ       | No Difference  |

<sup>1</sup> Statistically significant increase in samples from anti-IL-10 treated animals relative to samples from controls.

<sup>2</sup> Statistically significant decrease in samples from anti-IL-10 treated animals relative to samples from controls.

<sup>3</sup> Greater than 50% of samples being below the lower limit of quantification for the assay.

<sup>4</sup> Cytokine/chemokines not assayed for in that particular sample.

**Supplemental Table 2. Parameters used in computational simulation of granulomas.**

| Parameter                         | Definition                                                                            | min    | max     | Units         |
|-----------------------------------|---------------------------------------------------------------------------------------|--------|---------|---------------|
| Fibroblast: IL10ProlifMax         | Amount of IL10 that restricts fibroblast proliferation completely                     | 0.000  | 0.000   | Moles         |
| Fibroblast: initNumber            | Initial number of resting fibroblasts on the grid                                     | 10.000 | 20.000  |               |
| Mac: dIL10Act                     | Secretion rate of IL10 by activated macrophage                                        | 0.051  | 0.200   | Molecules/sec |
| Mac: dIL10Inf                     | Secretion rate of IL10 by infected macrophage                                         | 0.051  | 0.199   | Molecules/sec |
| Mac: maxRecProb                   | Maximum recruitment probability for macrophages                                       | 0.027  | 0.040   |               |
| Mac: nrExtMtbUptakeAct            | Total number of extracellular bacteria an activated macrophage can uptake/kill        | 4.000  | 6.000   |               |
| Mac: probKillExtMtbRest           | Total number of extracellular bacteria a resting macrophage can uptake/kill           | 0.100  | 0.499   |               |
| Mac: tgfbActivationFraction       | Fraction of latent TGFB that becomes active                                           | 0.001  | 0.099   |               |
| Mac: tgfbBindingRate              | Fraction of active TGFB that is bound by macrophage                                   | 0.046  | 0.046   |               |
| Mac: TGFBmax                      | Max amount of TGFB for inhibiting bacterial killing by macrophage                     | 1.032  | 995.632 | Molecules     |
| Myofibroblast: maxCollagen        | Maximum amount of collagen that can be secreted into a compartment"                   | 1.006  | 9.986   | Molecules     |
| Tcell: tgfbBindingRate            | Fraction of active TGFB that is bound by T cell                                       | 0.000  | 0.099   |               |
| Tcell: TGFBmax                    | Max amount of TGFB for inhibiting T-cell proliferation                                | 0.101  | 0.500   | Molecules     |
| Tcyt: maxRecProb                  | Maximum recruitment probability for T cells                                           | 0.051  | 0.250   |               |
| Tcyt: probCognate                 | Probability a recruited cytotoxic T cell is cognate                                   | 0.050  | 0.499   |               |
| Tcyt: recruitmentHalfSatChemokine | Half-saturation parameter for chemokine-dependent cytotoxic T-cell recruitment        | 0.002  | 7.591   |               |
| Tcyt: recruitmentHalfSatTNF       | Half-saturation parameter for TNF-dependent cytotoxic T-cell recruitment              | 0.001  | 1.098   |               |
| Tcyt: thresholdRecChemokine       | Threshold of chemokine for chemokine-dependent recruitment of cytotoxic T cells       | 0.050  | 1.053   |               |
| Tcyt: thresholdRecTNF             | Threshold of TNF for TNF-dependent recruitment of cytotoxic T cells                   | 0.010  | 0.244   |               |
| Tgam: maxRecProb                  | Maximum recruitment probability for T cells                                           | 0.063  | 0.250   |               |
| Tgam: probCognate                 | Probability a recruited gamma-producing T cell is cognate                             | 0.100  | 0.496   |               |
| Tgam: recruitmentHalfSatChemokine | Half-saturation parameter for chemokine-dependent gamma-producing T-cell recruitment  | 0.001  | 2.196   |               |
| Tgam: recruitmentHalfSatTNF       | Half-saturation parameter for TNF-dependent gamma-producing T-cell recruitment        | 0.001  | 1.450   |               |
| Tgam: thresholdRecChemokine       | Threshold of chemokine for chemokine-dependent recruitment of gamma-producing T cells | 0.007  | 0.197   |               |
| Tgam: thresholdRecTNF             | Threshold of TNF for TNF-dependent recruitment of gamma-producing T cells             | 0.010  | 0.374   |               |
| Treg: dIL10                       | Secretion rate of IL-10 by regulatory T-cells                                         | 0.073  | 0.738   | Molecules/sec |
| Treg: probCognate                 | Probability a recruited regulatory T cell is cognate                                  | 0.051  | 0.497   |               |
| Treg: recruitmentHalfSatChemokine | Half-saturation parameter for chemokine-dependent regulatory T-cell recruitment       | 0.001  | 1.634   |               |
| Treg: recruitmentHalfSatTNF       | Half-saturation parameter for regulatory T-cell recruitment                           | 0.000  | 2.563   |               |
| Treg: thresholdRecChemokine       | Threshold of chemokine for chemokine-dependent recruitment of regulatory T cells      | 0.000  | 0.023   |               |
| Treg: thresholdRecTNF             | Threshold of TNF for TNF-dependent recruitment of gamma-producing T cells             | 0.000  | 0.186   |               |

# Supplemental Figure 1

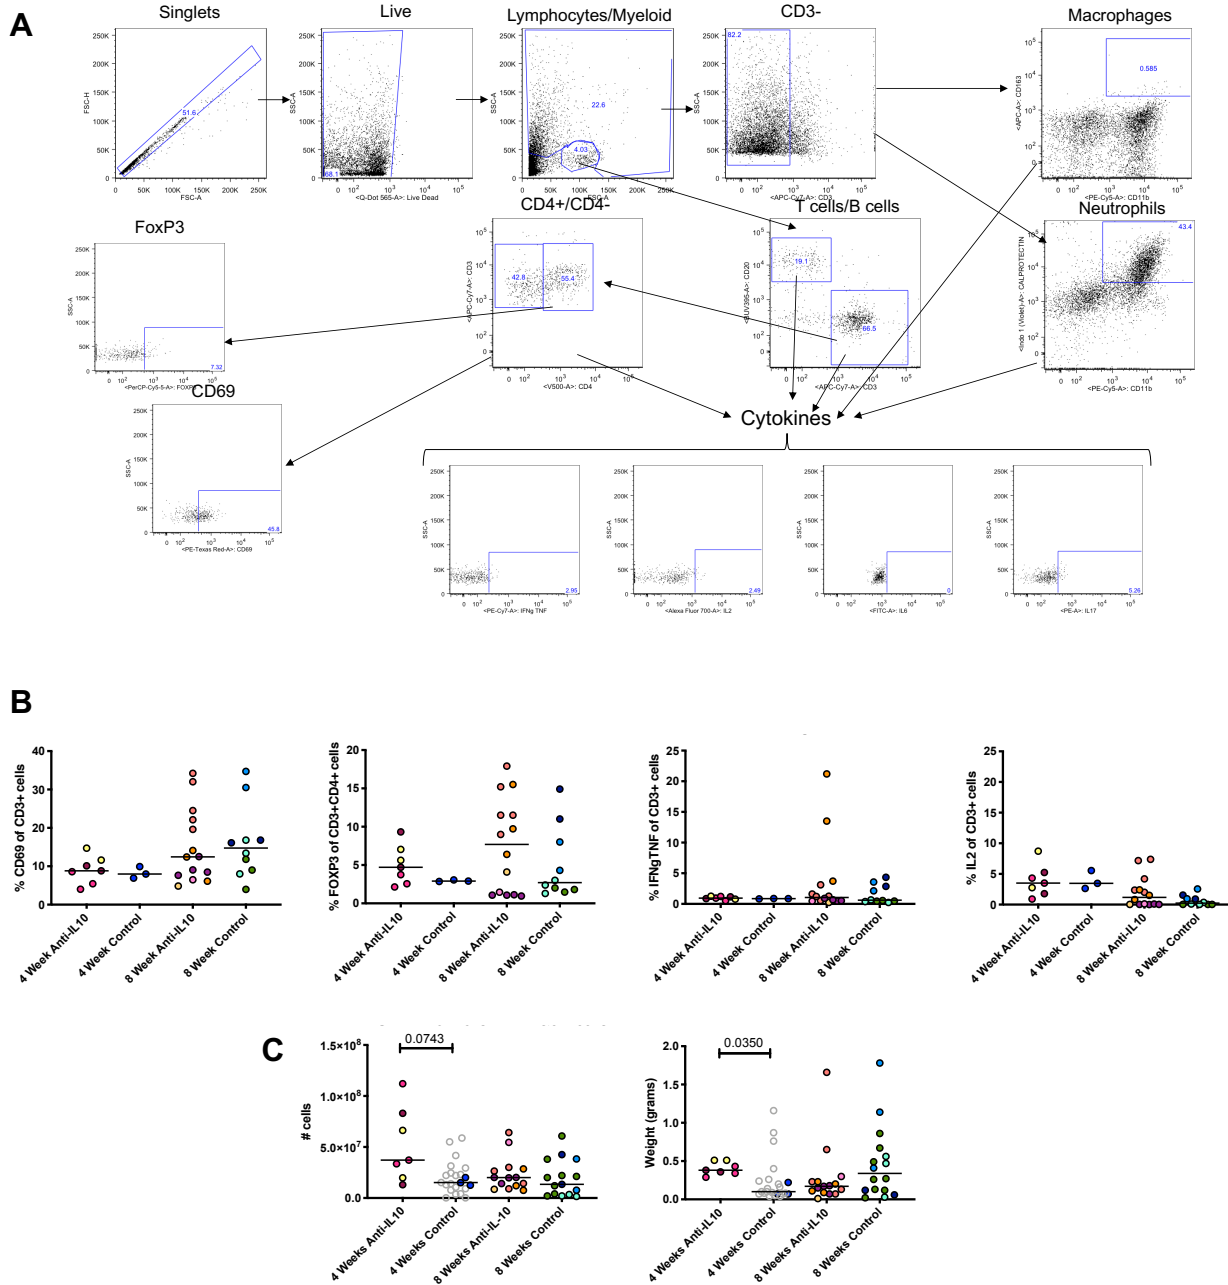

**Supplemental Figure 1. Gating strategy for flow cytometry of lung granulomas and frequencies of T cell types, total number of cells and weights of CFU+ LNs.** A) Only samples with greater than 70 CD3 cells were used for analysis. CD4- T cells were used as an approximation for CD8 T cells because of flow antibody panel constraints. B) Frequencies of T cell types by flow cytometry are similar among anti-IL-10 treated and untreated NHPs. Each point represents a CFU+ LN, each color is a NHP. Lines at medians. C) Number of cells counted by hemacytometer and weights of LNs at time of excision. Each point represents a CFU+ LN, each color is a NHP (gray is historical control). Lines at medians. Kruskal-Wallis Test was performed and Dunn's Multiple Comparisons adjusted p-values were reported.

## Supplemental Figure 2

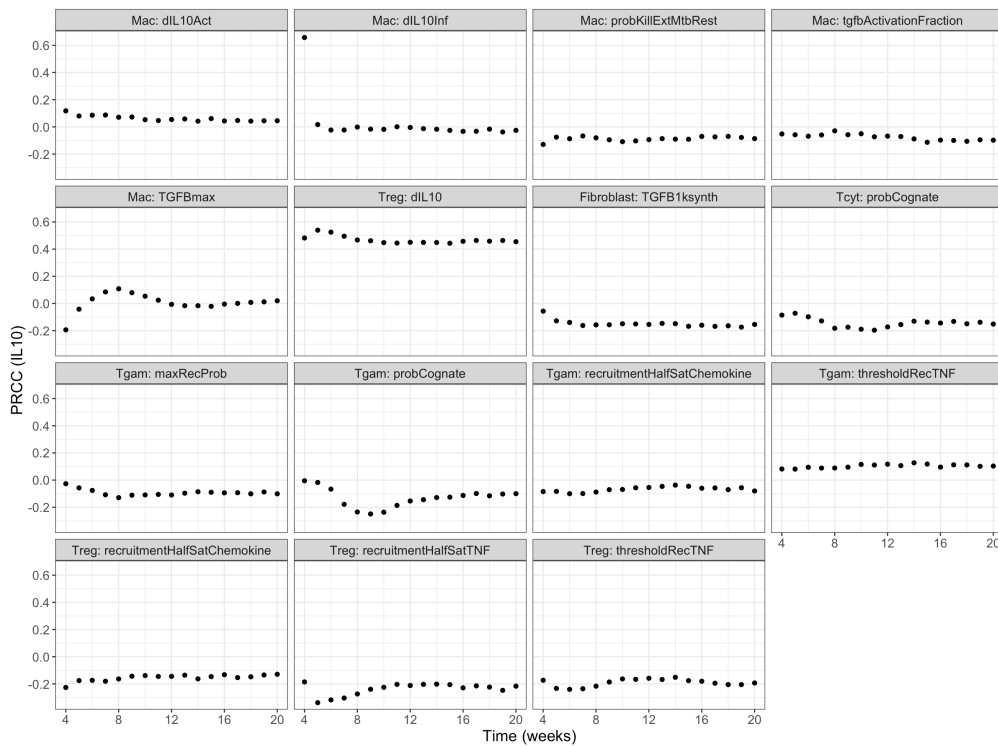

**Supplemental Figure 2. Parameters that influence IL-10 concentration in granulomas.** Longitudinal PRCCs of parameters that are significantly correlated at one or more time points (Z-test,  $p < 0.05$ , with a magnitude of greater than 0.1), with the concentration of IL-10 in the lung environment over the course of Mtb infection. PRCCs were calculated independently at each time point as described in the Methods.
